# Supplementary figures and images for: A Quantitative Systems Pharmacology Model of Gaucher Disease Type 1 Provides Mechanistic Insight Into the Response to Substrate Reduction Therapy With Eliglustat
Source: PubMed Central journal article supplement — CPT Pharmacometrics Syst Pharmacol. 2020 Jun 19;9(7):374–83. doi: 10.1002/psp4.12506 (PMC7376290; doi:10.1002/psp4.12506), 2020-06-19

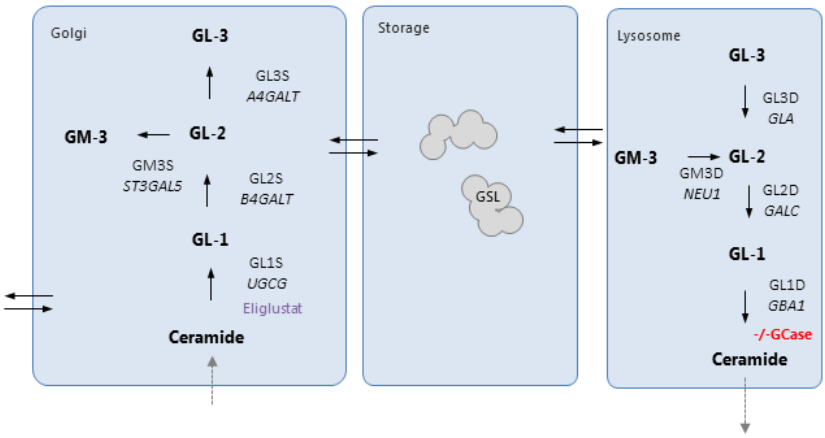

Supplement: PSP4-9-374-s002.pdf [file PSP4-9-374-s002.pdf]

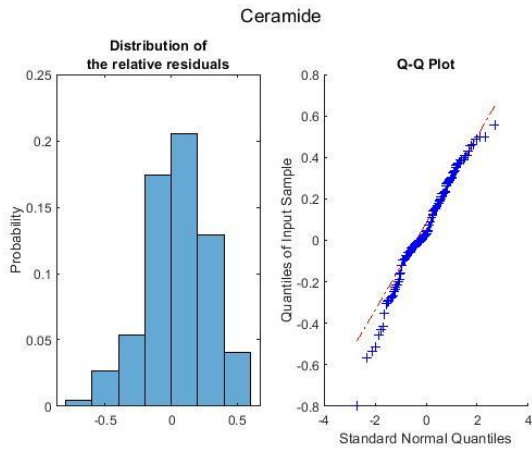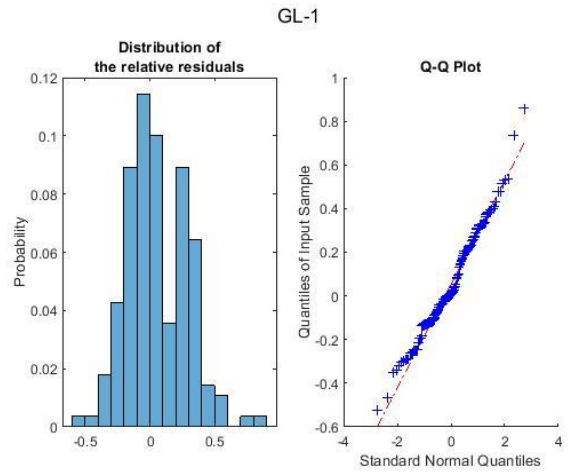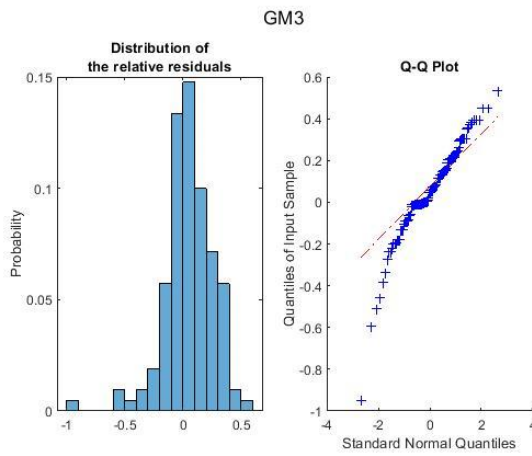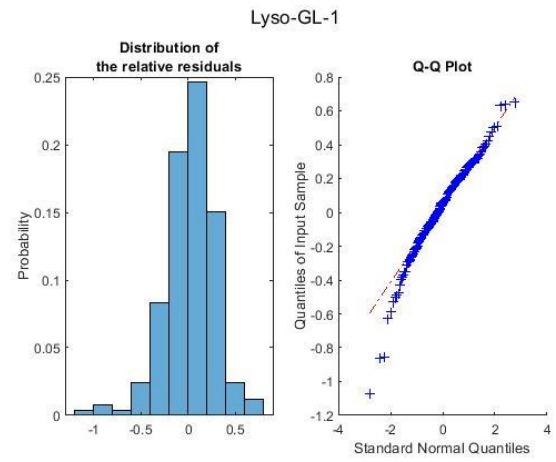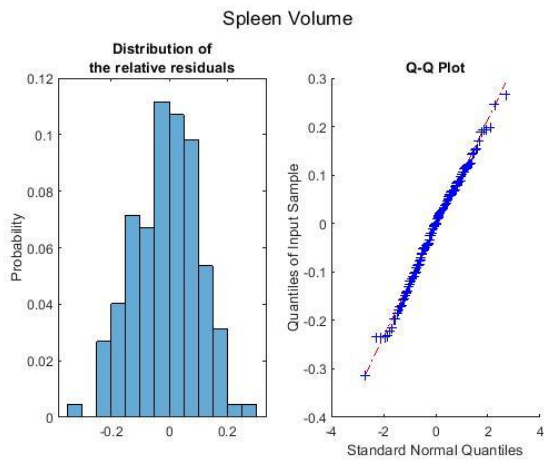

Supplement: PSP4-9-374-s004.pdf [file PSP4-9-374-s004.pdf]
